# Supplementary material for: Highly sensitive and selective detection of Hg2+ in aqueous solution with mercury-specific DNA and Sybr Green I
Source: Royal Society of Chemistry journal article supplement (doi:10.1039/b806885b), 2008-01-01
Supplement: b806885b.pdf [file b806885b.pdf]

## Electronic Supplementary Information

### **Highly Sensitive and Selective Detection of Hg<sup>2+</sup> in Aqueous Solution with Mercury Specific DNA and Sybr Green I**

#### Experimental Section

MSD (5'-TTCTTTCTTCCCCTTGTTTGTT-3') and the non-cognate oligonucleotide sequence (5'-AAGAAAGAAGGGGAACAAACAA-3') were synthesized and HPLC purified from research biolab Inc. (Singapore). SG (10000×) was purchased from invitrogen inc. When in use, it was diluted to 250× with DMSO, then to 125× with water to make a stock solution. The concentration of 125× SG solution is calculated to be  $2.45 \times 10^{-4}$  M according to the research from Vitzthum, et al in 2004.<sup>1</sup> Other chemicals were all ordered from Sigma.  $1.58 \times 10^{-8}$  M MSD was first incubated with different amount of Hg<sup>2+</sup> in 3 mL of 10 mM MOPS buffer containing 0.1 M NaNO<sub>3</sub>, pH 7.5. 1 uL of 125× SG was then added to the solution. After incubation for two minutes, the mixture was used for the fluorescence study with a Perkin-Elmer LS-55 fluorometer equipped with a xenon lamp excitation source and a Hamamatsu (Japan) 928 PMT. CD measurements were carried out using Jasco J-810 spectropolarimeter (Japan) with a 1 mm optical path cell.

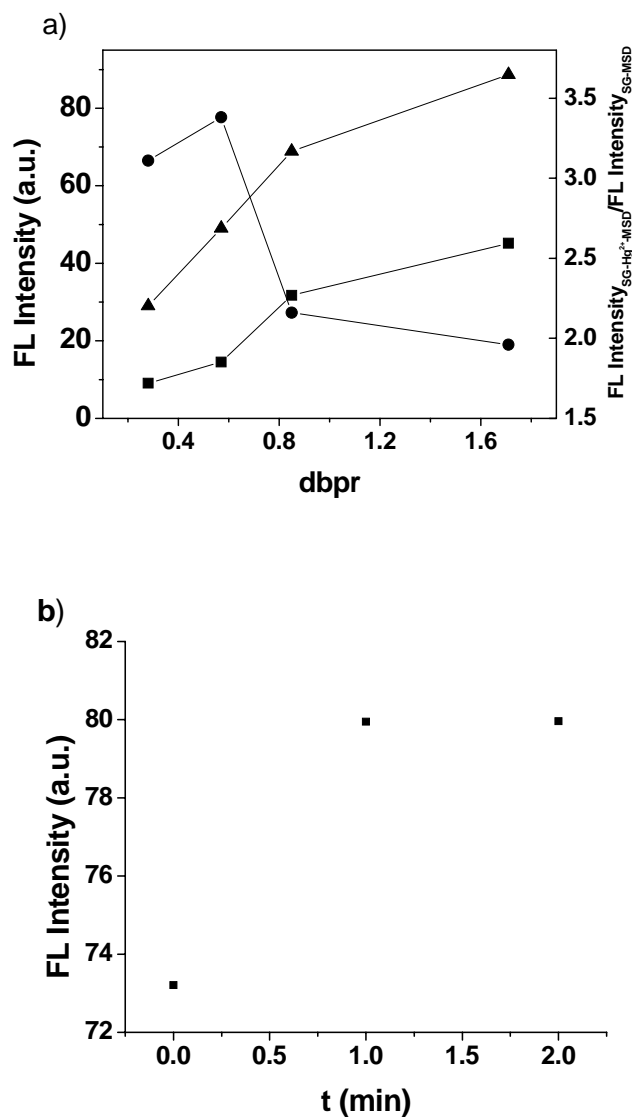

Figure S1. a) Relationship between fluorescence intensity and dbpr for SG-Hg<sup>2+</sup>-MSD and SG-MSD. Squares and triangles represent the fluorescence intensities of SG-MSD and SG-Hg<sup>2+</sup>-MSD, respectively; circles are the ratios of the fluorescence intensity of SG-Hg<sup>2+</sup>-MSD to that of SG-MSD. b) Relationship between the fluorescence intensity and incubation time for SG to interact with Hg<sup>2+</sup>-MSD. [MSD] =  $1.58 \times 10^{-8}$  M and [Hg<sup>2+</sup>] = 9.96 nM were used for optimization of dbpr. [MSD] =  $1.58 \times 10^{-8}$  M, [Hg<sup>2+</sup>] = 16.61 nM and [SG] =  $8.14 \times 10^{-8}$  M were used for (b). 10 mM MOPS, 0.1 M NaNO<sub>3</sub>, pH 7.5 was used as the buffer.

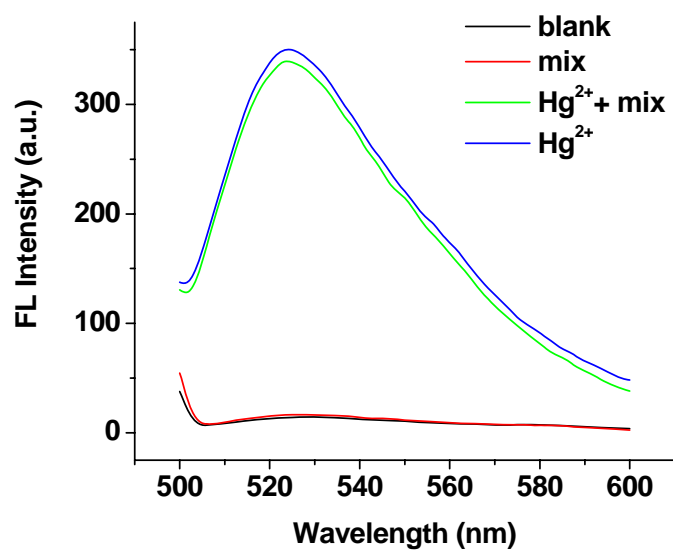

Figure S2. Fluorescence spectra of solutions containing MSD only (blank), MSD with mixture of  $\text{Co}^{2+}$ ,  $\text{Cu}^{2+}$ ,  $\text{Ni}^{2+}$ ,  $\text{Pb}^{2+}$ ,  $\text{Cd}^{2+}$ ,  $\text{Ca}^{2+}$ ,  $\text{Mg}^{2+}$ ,  $\text{Ba}^{2+}$ ,  $\text{Zn}^{2+}$  ions in the presence and absence of  $\text{Hg}^{2+}$ , and MSD with  $\text{Hg}^{2+}$  only.  $[\text{MSD}] = 1.58 \times 10^{-8} \text{ M}$ ;  $[\text{Hg}^{2+}] = 132.87 \text{ nM}$ ;  $[\text{non-specific ion}] = 1.00 \text{ }\mu\text{M}$  each.

Table S1 Fluorescence data of MSD and non-cognate oligonucleotide (DNAnc) in the absence and presence of Hg<sup>2+</sup> <sup>a</sup>

MSD: 5'-TTCTTTCTTCCCCTTGTTTGTT-3'

|                                       |       |       |       |       |       |
|---------------------------------------|-------|-------|-------|-------|-------|
| Concentration of Hg <sup>2+</sup> /nM | 0     | 33.2  | 66.4  | 99.6  | 166.1 |
| FI                                    | 14.5  | 141.8 | 280.5 | 346.8 | 329.3 |
| Wavelength/nm                         | 528.2 | 526.2 | 523.0 | 524.0 | 525.1 |

Non-cognate oligonucleotide: 5'-AACAAACAAGGGGAAGAAAGAA-3'

|                        |       |       |       |       |       |
|------------------------|-------|-------|-------|-------|-------|
| Concentration of Hg/nM | 0     | 33.2  | 66.4  | 332.0 | 664.0 |
| FI                     | 7.9   | 11.4  | 22.0  | 33.0  | 23.4  |
| Wavelength/nm          | 529.0 | 529.0 | 529.0 | 529.2 | 530.0 |

a: [MSD] = [DNAnc] =  $1.58 \times 10^{-8}$  M, [SG] =  $8.14 \times 10^{-8}$  M. A buffer of 10 mM MOPS, 0.1 M NaNO<sub>3</sub>, pH 7.5 was used.

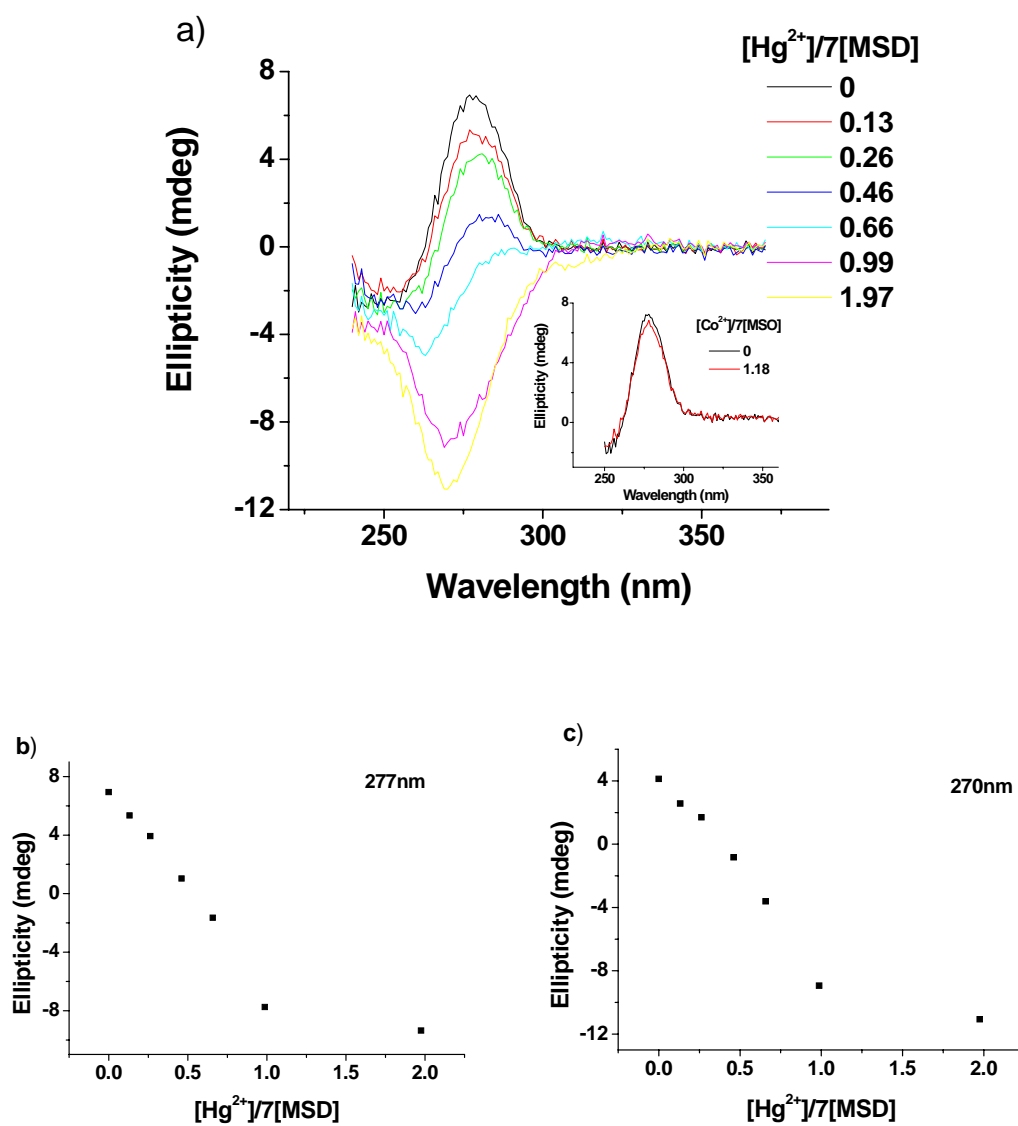

Figure S3. a) CD spectra of MSD upon binding to  $\text{Hg}^{2+}$ . b), c) Relationships between CD intensities at wavelengths of 277, 270 nm and  $[\text{Hg}^{2+}]/7[\text{MSD}]$ .  $[\text{MSD}] = 18.58 \mu\text{M}$ .  $[\text{Hg}^{2+}] = 0$  to  $256.21 \mu\text{M}$ . A buffer of 10 mM MOPS, 0.1 M  $\text{NaNO}_3$ , pH 7.5 was used.

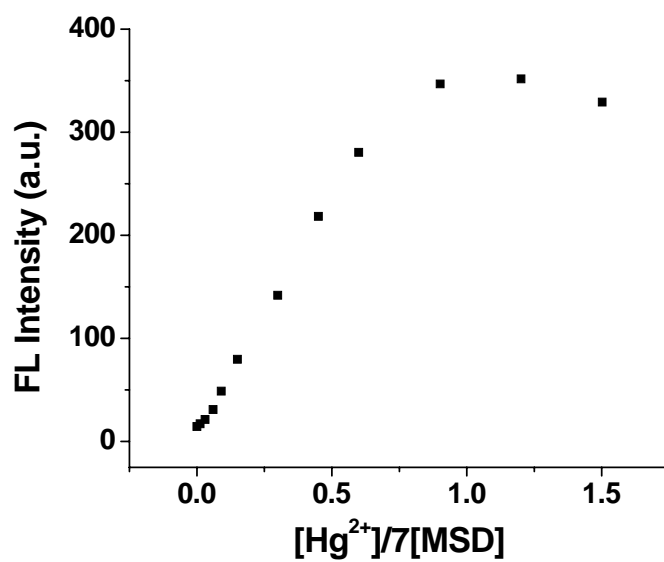

Figure S4. Relationship between the fluorescence intensity of SG-Hg<sup>2+</sup>-MSD vs. [Hg<sup>2+</sup>]/7[MSD]

#### Reference

- 1 H. Zipper, H. Brunner, J. Bernhagen and F. Vitzthum, *Nucleic Acids Research*, 2004, **32**, e103.
